# Supplementary material for: Contribution of the APOE Genotype to Cognitive Impairment in Individuals With NOTCH3 Cysteine‐Altering Variants
Source: PubMed Central journal article supplement — J Am Heart Assoc. 2023 Nov 20;12(22):e032689. doi: 10.1161/JAHA.123.032689 (PMC10727295; doi:10.1161/jaha.123.032689), 2023-11-20
Supplement: JAH3-12-e032689-s001.pdf [file JAH3-12-e032689-s001.pdf]

# **Supplemental Material**

## AGReMA statement checklist for the mediation analysis.

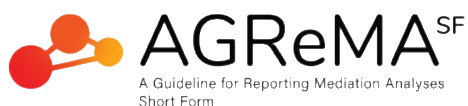

| Section/Topic          | Item Number | Item Description                                                                                                                                                                                                                                                                                                                                                                                                  | Reported on page No                              |
|------------------------|-------------|-------------------------------------------------------------------------------------------------------------------------------------------------------------------------------------------------------------------------------------------------------------------------------------------------------------------------------------------------------------------------------------------------------------------|--------------------------------------------------|
| <b>Introduction</b>    |             |                                                                                                                                                                                                                                                                                                                                                                                                                   |                                                  |
| Objectives             | 1           | State the objectives of the study specific to the mechanisms of interest. The objectives should specify whether the study aims to test or estimate the mechanistic effects                                                                                                                                                                                                                                        | Page 6, line 10-12                               |
| <b>Methods</b>         |             |                                                                                                                                                                                                                                                                                                                                                                                                                   |                                                  |
| Effects of interest    | 2           | Specify the effects of interest                                                                                                                                                                                                                                                                                                                                                                                   | Page 11 line 11-16                               |
| Causal assumptions     | 3           | Specify assumptions about the causal model                                                                                                                                                                                                                                                                                                                                                                        | Figure 2A                                        |
| Measurement            | 4           | Clearly describe the interventions or exposures, mediators, outcomes, confounders, and moderators that were used in the analyses. Specify how and when they were measured, the measurement properties, and whether blinded assessment was used                                                                                                                                                                    | Page 8, line 2-9; page 9, line 13-page 10 line 8 |
| Statistical methods    | 5           | Describe the statistical methods used to estimate the causal relationships of interest. This description should specify analytical strategies used to reduce confounding, model building procedures, justification for the inclusion or exclusion of possible interaction terms, modelling assumptions, and methods used to handle missing data. Provide a reference to the statistical software and package used | Page 11, line 11-16<br>Figure 2A                 |
| <b>Results</b>         |             |                                                                                                                                                                                                                                                                                                                                                                                                                   |                                                  |
| Participants           | 6           | Describe baseline characteristics of participants included in mediation analyses. Report the total sample size and number of participants lost during follow-up or with missing data                                                                                                                                                                                                                              | Table 1; Page 12 line 7- page 13 line 6          |
| Outcomes and estimates | 7           | Report point estimates and uncertainty estimates for the exposure-mediator and mediator-outcome relationships. If inference concerning the causal relationship of interest is considered feasible given the causal assumptions, report the point estimate and uncertainty estimate                                                                                                                                | Figure 2B. 2C                                    |
| <b>Discussion</b>      |             |                                                                                                                                                                                                                                                                                                                                                                                                                   |                                                  |
| Limitations            | 8           | Discuss the limitations of the study including potential sources of bias                                                                                                                                                                                                                                                                                                                                          | Page 22, line 10-13                              |
| Interpretation         | 9           | Interpret the estimated effects considering the study's magnitude and uncertainty, plausibility of the causal assumptions, limitations, generalizability of the findings, and results from relevant studies                                                                                                                                                                                                       | Page 22, line 13-16                              |

From: Lee H, Cashin AG, Lamb SE, Hopewell S, Vansteelandt S, VanderWeele TJ, et al. A Guideline for Reporting Mediation Analyses of Randomized Trials and Observational Studies. The AGReMA Statement. JAMA. 2021;326(11):1045–1056. doi:10.1001/jama.2021.14075

AGReMA-SF is designed for articles that report mediation analyses of randomized trials or observational studies as a secondary focus of a paper. AGReMA-SF should be used in conjunction with CONSORT or STROBE for complete reporting.

For more information, visit: [agrema-statement.org](http://agrema-statement.org)

**Table S1, Pathogenic *NOTCH3* variants of the enrolled individuals.**

| Exon | EGFR  | Amino acid change | Coding sequence change | Case number (%) |
|------|-------|-------------------|------------------------|-----------------|
| 2    | 1     | p.S60C            | c.179c>G               | 1 (0.4)         |
| 3    | 2     | p.R90C            | c.268C>T               | 1 (0.4)         |
| 3    | 2     | p.R110C           | c.328C>T               | 4 (1.6)         |
| 4    | 2     | p.S118C           | c.353C>G               | 4 (1.6)         |
| 4    | 3     | p.R133C           | c.397C>T               | 3 (1.2)         |
| 4    | 3     | p.R141C           | c.421C>T               | 2 (0.8)         |
| 4    | 3     | p.R153C           | c.457C>T               | 1 (0.4)         |
| 4    | 3     | p.C155Y           | c.464G>A               | 2 (0.8)         |
| 6    | 8     | p.R332C           | c.994C>T               | 3 (1.2)         |
| 8    | 10    | p.G420C           | c.1258G>T              | 1 (0.4)         |
| 8    | 10    | p.R427C           | c.1279C>T              | 1 (0.4)         |
| 11   | 13/14 | p.R544C           | c.1630C>T              | 210 (85.4)      |
| 11   | 14    | p.R558C           | c.1672C>T              | 3 (1.2)         |
| 11   | 15    | p.R587C           | c.1759C>T              | 2 (0.8)         |
| 18   | 25    | p.C977S           | c.2929T>A              | 4 (1.6)         |
| 22   | 31    | p.R1231C          | c.3691C>T              | 1 (0.4)         |
| 23   | 32    | p.C1250R          | c.3748A>G              | 2 (0.8)         |

EGFR = epidermal-growth-factor-like repeats.

**Table S2. Univariate analysis of clinical variables associated with global cognitive performance, measured by MMSE, in patients harboring cysteine-altering *NOTCH3* variants.**

|                                                                                                              | Univariate analysis |                |         |
|--------------------------------------------------------------------------------------------------------------|---------------------|----------------|---------|
|                                                                                                              | B                   | B 95% CI       | P value |
| Age, per 10 years                                                                                            | -2.535              | -3.314, -1.755 | <0.0001 |
| Sex                                                                                                          | 0.637               | -1.150, 2.425  | 0.483   |
| Hospital                                                                                                     | -1.697              | -3.512, 0.117  | 0.067   |
| Education                                                                                                    |                     |                |         |
| 7-12 years vs. < 6 years                                                                                     | 4.174               | 2.065, 6.283   | 0.0001  |
| $\geq$ 13 years vs. < 6 years                                                                                | 6.835               | 4.692, 8.978   | <0.0001 |
| <i>NOTCH3</i> variant position                                                                               |                     |                |         |
| EGFR 1-6 vs. EGFR 7-34                                                                                       | 0.440               | -2.994, 3.874  | 0.801   |
| p.R544C vs. other variants                                                                                   | 0.875               | -1.624, 3.375  | 0.491   |
| <i>APOE</i> genotype                                                                                         |                     |                |         |
| $\epsilon$ 2 carrier ( $\epsilon$ 2 $\epsilon$ 3) vs. $\epsilon$ 3 $\epsilon$ 3                              | -4.517              | -7.620, -1.413 | 0.0045  |
| $\epsilon$ 4 carrier ( $\epsilon$ 3 $\epsilon$ 4 or $\epsilon$ 4 $\epsilon$ 4) vs. $\epsilon$ 3 $\epsilon$ 3 | -1.091              | -3.444, 1.263  | 0.362   |
| Stroke                                                                                                       | -3.664              | -5.439, -1.890 | <0.0001 |
| Ischemic stroke                                                                                              | -3.570              | -5.317, -1.824 | <0.0001 |
| Hemorrhagic stroke                                                                                           | -0.402              | -2.785, 1.980  | 0.740   |
| Diabetes mellitus                                                                                            | -2.030              | -4.277, 0.216  | 0.076   |
| Hypertension                                                                                                 | -1.453              | -3.247, 0.342  | 0.112   |
| Hyperlipidemia                                                                                               | 1.077               | -0.792, 2.947  | 0.257   |
| Smoking                                                                                                      | 0.865               | -1.248, 2.979  | 0.421   |
| Alcohol                                                                                                      | 1.394               | -1.099, 3.868  | 0.273   |
| DWM hyperintensity score                                                                                     | -4.655              | -5.903, -3.407 | <0.0001 |
| PVWM hyperintensity score                                                                                    | -4.515              | -6.213, -2.817 | <0.0001 |
| MTA score                                                                                                    | -3.919              | -4.805, -3.032 | <0.0001 |

DWM = deep white matter; EGFR = epidermal-growth-factor-like repeats; MTA = mesial temporal atrophy; PVWM = periventricular white matter.

**Table S3. Association between MMSE and *NOTCH3* variant position.**

| <i>NOTCH3</i> variant position | Univariate analysis |                 |         | Model adjusted for age |                  |         |
|--------------------------------|---------------------|-----------------|---------|------------------------|------------------|---------|
|                                | B                   | (95% CI)        | p-value | Adjusted B             | (95% CI)         | p-value |
| EGFR 1-6 vs. 7-34              | 0.440               | (-2.994, 3.874) | 0.801   | -2.982                 | (-6.304, 0.340)  | 0.078   |
| EGFR 1-8 vs. 9-34              | 0.862               | (-2.344, 4.067) | 0.597   | -2.888                 | (-6.043, 0.268)  | 0.073   |
| EGFR 1-10 vs. 11-34            | 0.246               | (-2.833, 3.324) | 0.875   | -3.271                 | (-6.276, -0.265) | 0.033   |
| p.R544C vs. Other variants     | 0.875               | (-1.624, 3.375) | 0.491   | 2.979                  | (0.610, 5.347)   | 0.014   |

EGFR = epidermal-growth-factor-like repeats.

**Table S4. Comparison of imaging characteristics between *NOTCH3* variant and *APOE* genetic groups.**

|                                       | Mesial temporal atrophy |         | DWM hyperintensity      |         |
|---------------------------------------|-------------------------|---------|-------------------------|---------|
|                                       | B estimate (95% CI) *   | P-value | B estimate (95% CI) *   | P-value |
| <b><i>APOE</i> genotype</b>           |                         | 0.008   |                         | 0.216   |
| ε2 carrier (ε2ε3)                     | 0.401 (0.052, 0.749)    | 0.025   | 0.046 (-0.226, 0.319)   |         |
| ε4 carrier (ε3ε4 or ε4ε4)             | 0.320 (0.066, 0.574)    | 0.014   | -0.173 (-0.377, 0.032)  |         |
| ε3ε3 (Reference)                      |                         |         |                         |         |
| <b><i>NOTCH3</i> variant position</b> |                         |         |                         |         |
| EGFR 1-6                              | 0.158 (-0.242, -0.558)  | 0.437   | 0.540 (0.242, 0.838)    | 0.0004  |
| EGFR 7-34 (Reference)                 |                         |         |                         |         |
| <b><i>NOTCH3</i> p.R544C</b>          | -0.108 (-0.395, 0.108)  | 0.460   | -0.376 (-0.162, -0.590) | 0.001   |

\* Models were adjusted for age and sex

DWM = deep white matter; EGFR = epidermal-growth-factor-like repeats.

**Figure S1. Flowchart of subject enrollment.**

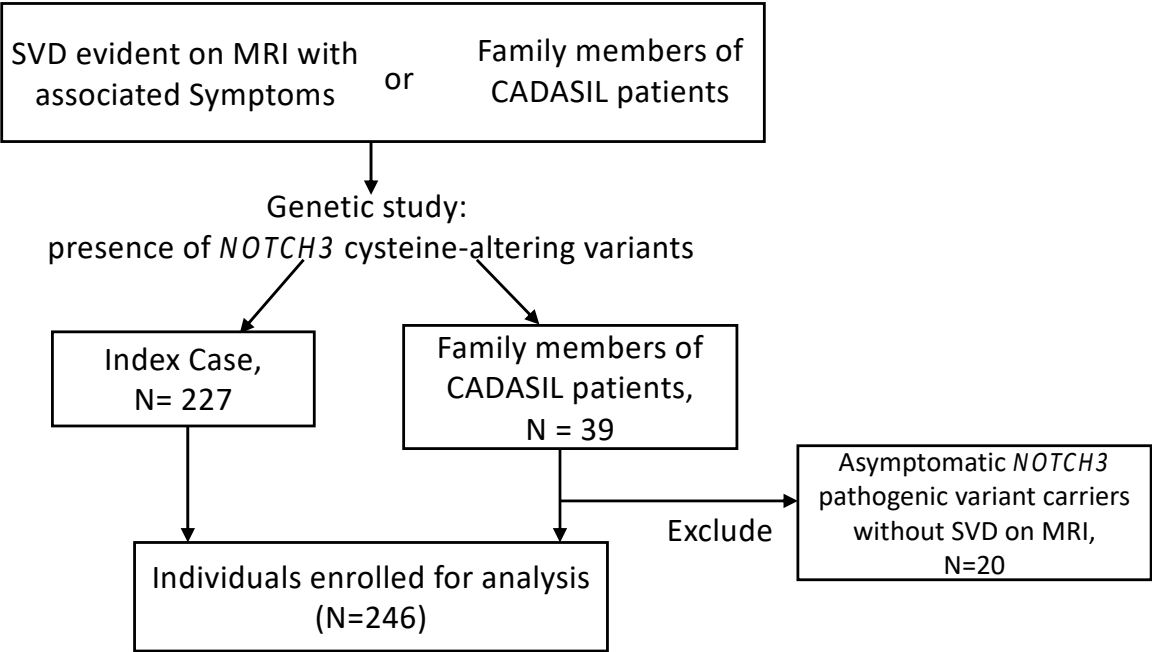

SVD = small vessel disease.
